# Supplementary material for: Cyclophosphazene–organostannoxane hybrid motifs in polymeric and molecular systems
Source: Royal Society of Chemistry journal article supplement (doi:10.1039/c4ra09371b), 2014-01-01
Supplement: c4ra09371b1.pdf [file c4ra09371b1.pdf]

**Electronic Supporting Information**

**Cyclophosphazene-Organostannoxane Hybrid Motifs**

**in Polymeric and Molecular Systems**

**Subrata Kundu<sup>a</sup>, Chandrajeet Mohapatra<sup>a</sup> and Vadapalli Chandrasekhar,<sup>\*a,b</sup>**

<sup>a</sup>Department of Chemistry, Indian Institute of Technology Kanpur, Kanpur - 208016, India

<sup>b</sup>National Institute of Science Education and Research, Institute of Physics Campus, School of Chemical Sciences, Bhubaneswar-751005, India

\*E-mail: [vc@iitk.ac.in](mailto:vc@iitk.ac.in); [vc@niser.ac.in](mailto:vc@niser.ac.in); Phone: (+91) 512-259-7259. Fax: (+91)521-259-0007/7436.

## Experimental Section:

Solvents were distilled and dried prior to use according to standard procedures. [*n*-Bu<sub>2</sub>SnO]<sub>n</sub>, 3,5-dinitrosalicylic acid, 2,2'-biphenol and 4-hydroxy pyridine (all from Aldrich) were used as such. Hexachlorocyclotriphosphazene (Nippon Soda, Japan) was recrystallized from *n*-hexane before use. Melting points were measured using a JSGW melting point apparatus and are uncorrected. Elemental analyses were carried out using a Thermoquest CE instruments model EA/110 CHNS-O elemental analyzer. Infrared spectra were recorded as KBr pellets on a FT-IR Bruker-Vector Model. <sup>1</sup>H, <sup>31</sup>P and <sup>119</sup>Sn NMR spectra were obtained on a JEOL-DELTA2 500 model spectrometer using CDCl<sub>3</sub> as solvent. Chemical shifts were referenced with respect to tetramethylsilane (for <sup>1</sup>H NMR), phosphoric acid (for <sup>31</sup>P NMR) and tetramethyltin (for <sup>119</sup>Sn NMR) respectively. <sup>119</sup>Sn NMR spectra were recorded under broad-band decoupled conditions.

## Synthesis:

Compound **1**<sup>1</sup> and **L**<sup>2</sup> were synthesized according to literature procedure and purity was checked by <sup>1</sup>H, <sup>119</sup>Sn and <sup>31</sup>P NMR (given below).

### [*n*-Bu<sub>2</sub>Sn-OOR(O)H<sub>2</sub>O]<sub>n</sub> (**1**):

<sup>1</sup>H NMR (CDCl<sub>3</sub>): δ (ppm) = 0.84-1.94, (m, 18H, *n*-Bu); 8.62 (d, 1H, ArH); 8.86 (d, 1H, ArH).

<sup>119</sup>Sn NMR (CDCl<sub>3</sub>): δ (ppm) = -47.5

### *gem*-[N<sub>3</sub>P<sub>3</sub>(O<sub>2</sub>C<sub>12</sub>H<sub>8</sub>)<sub>2</sub>(OC<sub>5</sub>H<sub>4</sub>N-4)] (**L**):

<sup>1</sup>H NMR(CDCl<sub>3</sub>): δ (ppm) = 7.7 (d, 4H); 7.20-7.52 (m, 16H); 8.63 (d, 4H). <sup>31</sup>P NMR: δ (ppm) = 9.15(t), 25.20 (d) {<sup>2</sup>J(P-N-P) = 93.83 Hz}.

### Synthesis of **2** and **3**:

Polymer **1** (200 mg, 0.42 mmol) and **L** [*gem*-{N<sub>3</sub>P<sub>3</sub>(O<sub>2</sub>C<sub>12</sub>H<sub>8</sub>)<sub>2</sub>(OC<sub>5</sub>H<sub>4</sub>N-4)<sub>2</sub>}] (145mg, 0.21 mmol) were heated to reflux for 24h in 40 mL methanol. Then the methanol was concentrated to 5mL under reduced pressure to get a yellow precipitate. The yellow solid product was re-dissolved in 15mL of (1:1) CH<sub>3</sub>OH-CHCl<sub>3</sub> solvent mixture. Slow evaporation of the solvent mixture yielded compound **2** and **3** as a crystalline form.

Compounds **2** and **3** were separated by recrystallization from CHCl<sub>3</sub> solution. The polymer **2** was collected from chloroform solution (filtrate) and compound **3** was collected as an insoluble crystalline material.

**[*gem*-{N<sub>3</sub>P<sub>3</sub>-(O<sub>2</sub>C<sub>12</sub>H<sub>8</sub>)<sub>2</sub>(OC<sub>5</sub>H<sub>4</sub>N-4)<sub>2</sub>}{*n*-Bu<sub>2</sub>Sn-OOCR(O)}<sub>2</sub>]<sub>n</sub> (2), R= [3,5-(NO<sub>2</sub>)<sub>2</sub>C<sub>6</sub>H<sub>2</sub>]:** Yield: 216mg (63 %, with respect to tin). M.p.: 141 °C. Elemental Analysis: Calcd. (%) for C<sub>64</sub>H<sub>64</sub>N<sub>9</sub>O<sub>20</sub>P<sub>3</sub>Sn<sub>2</sub>: C, 47.76; H, 4.01; N, 7.83. Found: C, 47.26; H, 4.08; N, 7.89; <sup>1</sup>H NMR [DMSO-d<sub>6</sub>]: δ (ppm) = 0.73 (t, 12H, *n*-Bu); 1.19 (m, 8H, *n*-Bu); 1.33 (m, 8H, *n*-Bu); 1.42 (m, 8H, *n*-Bu); 7.16-7.51 (m, 16H, biphenol); 7.64 (d, 4H, Pyridyl); 8.57 (d, 2H, Ar- salicylate); 8.70 (d, 4H, Pyridyl); 8.79 (d, 2H, Ar- salicylate). <sup>31</sup>P NMR [DMSO-d<sub>6</sub>]: δ (ppm) = δ ppm = 25.22 (d, P(O<sub>2</sub>C<sub>12</sub>H<sub>8</sub>), 9.59 (t, P(O-C<sub>5</sub>H<sub>4</sub>N-3)<sub>2</sub>, {<sup>2</sup>J(P-N-P) = 95.52 Hz}); <sup>119</sup>Sn NMR [DMSO-d<sub>6</sub>]: δ (ppm) = -347 ppm. IR (KBr, v/cm<sup>-1</sup>): 3092 (m), 2956 (m, br), 2927 (m), 2869 (s), 1635 (s), 2605 (m), 1528 (s), 1436 (s), 1338 (s), 1228 (s), 1174 (m), 1092 (m), 889 (m), 719 (s), 609 (m), 522 (m). ESI-MS: m/z (%) 355.0531 [(*n*-Bu<sub>2</sub>Sn)<sub>2</sub>OOCR(O)]<sup>2+</sup> (100); 693.1010 [LH]<sup>+</sup> (58).

**[*gem*-{N<sub>3</sub>P<sub>3</sub>-(O<sub>2</sub>C<sub>12</sub>H<sub>8</sub>)<sub>2</sub>}(O)(*n*-Bu<sub>2</sub>Sn)<sub>2</sub>(μ<sub>3</sub>-O)(μ-OMe)]<sub>2</sub>.MeOH(3):** Yield: 29.8mg (13%, with respect to tin). M.p.: 189 °C. Elemental Analysis: Calcd. (%) for C<sub>64</sub>H<sub>64</sub>N<sub>9</sub>O<sub>20</sub>P<sub>3</sub>Sn<sub>2</sub>: C, 47.15; H, 5.71; N, 3.84. Found: C, 46.96; H, 5.78; N, 3.81. IR (KBr, v/cm<sup>-1</sup>): 3571 (m), 3422 (m, br),

3069(m, br), 2926 (s), 2957 (s), 2856 (m), 1635 (s), 1603 (s), 1500 (s), 1437 (s), 1227 (m), 1171(s), 1093 (s), 776 (s), 609 (s), 533 (m).

## References

1. L.Tian, F. Li, X.Zheng, Y.Sun, D.Yan and L. Tu, *Synth. React. Inorg. Met.-Org. Nano-Metal Chem.*, 2011, **41**, 454.
2. G. A. Carriedo, F. J. G. Alonso, J. L. García, R. J. Carbajo and F. L. Ortiz, *Inorg. Chem.*, 1999, **6**, 1015.

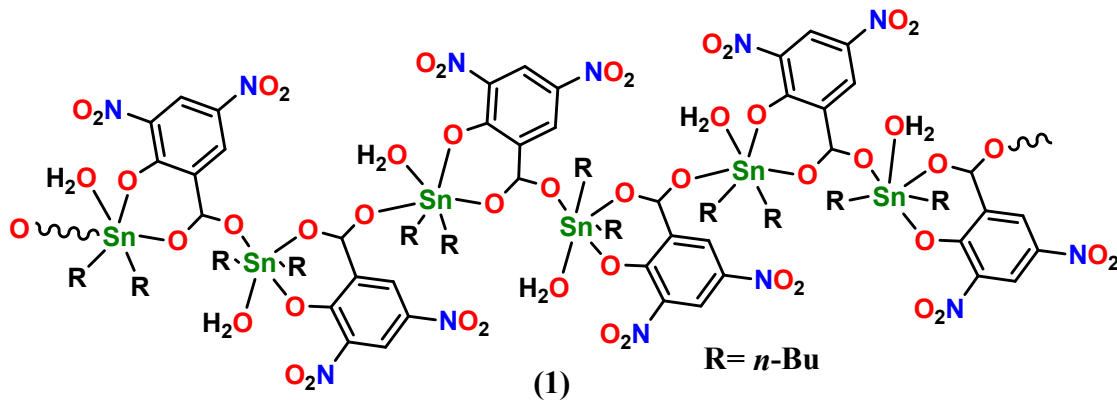

Figure S1: 1-D coordination polymer (1)

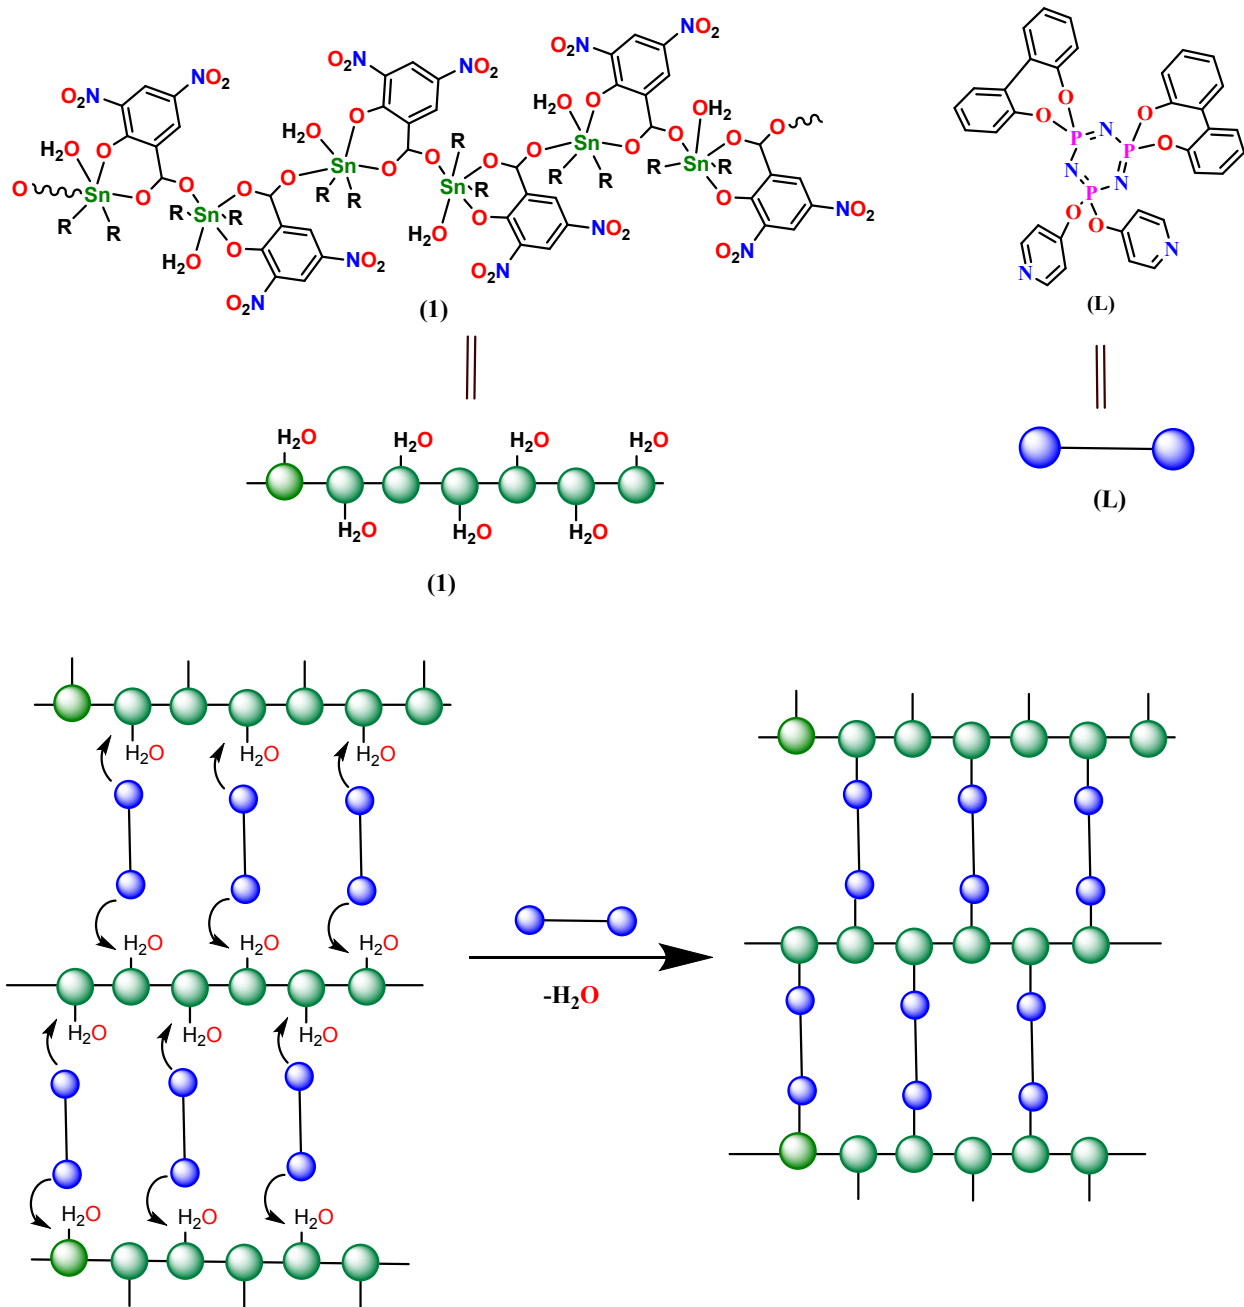

**Figure S2:** Schematic representation of the expected 2-D polymer in the reaction between **1** and **L**

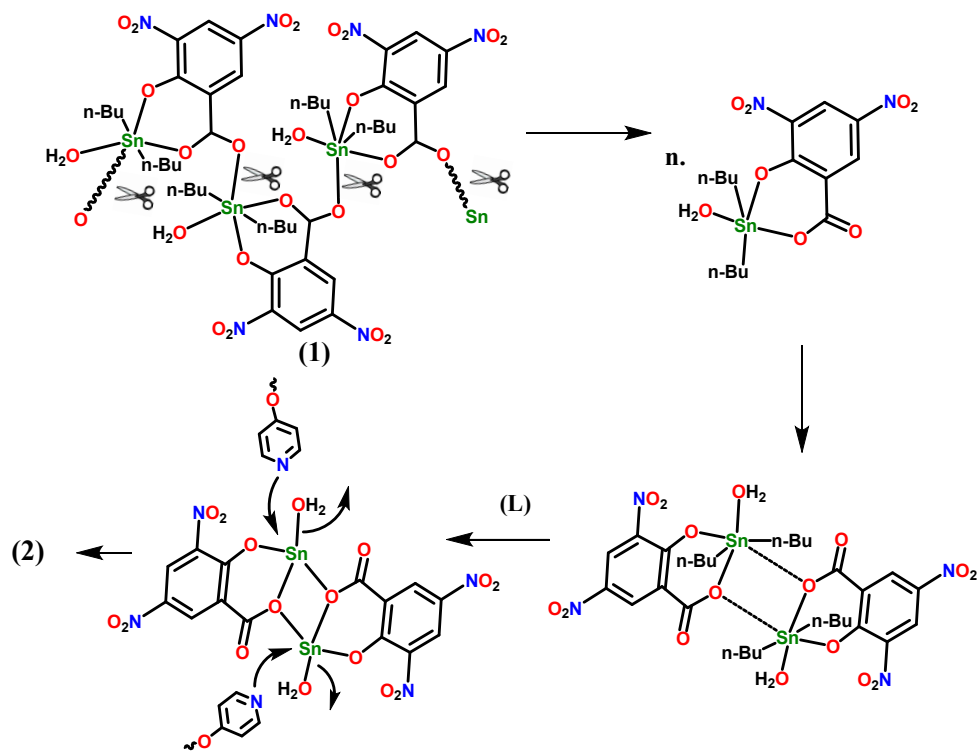

**Scheme S1:** Formation of **2** from **1**.

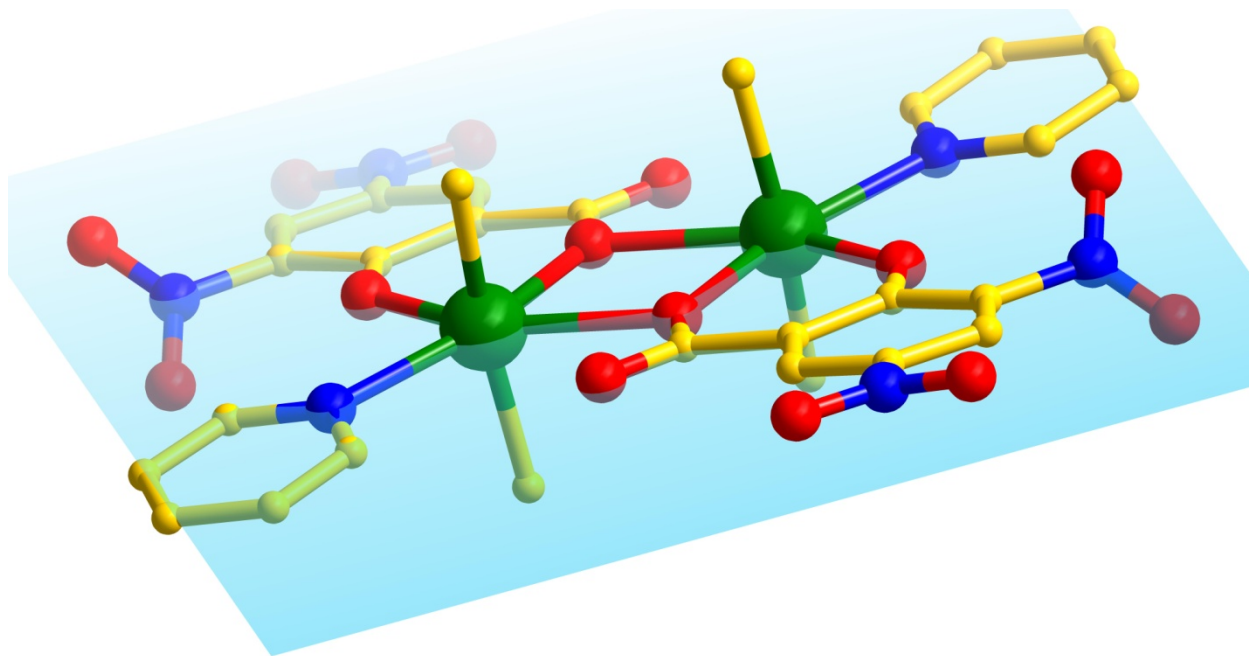

**Figure S3:** The core of polymer **1** lying in a plane.

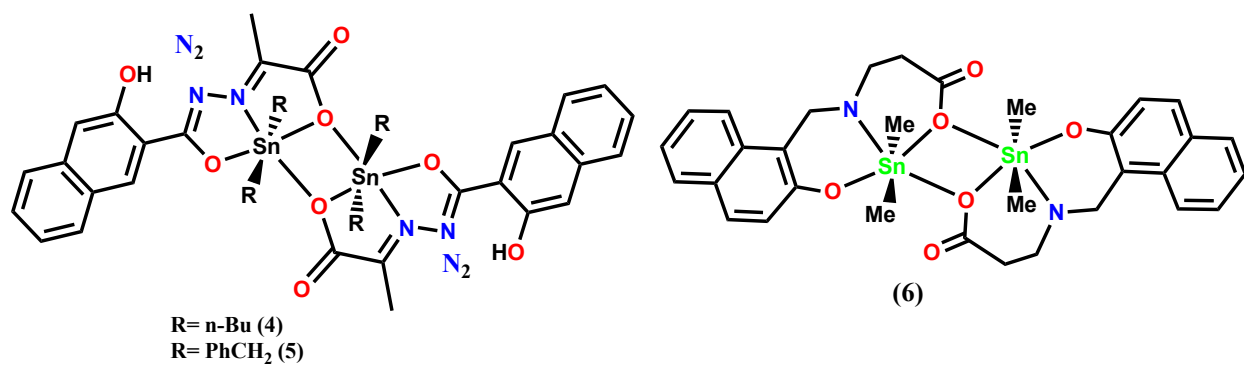

Chart S1: Carboxylate-bridged dimer

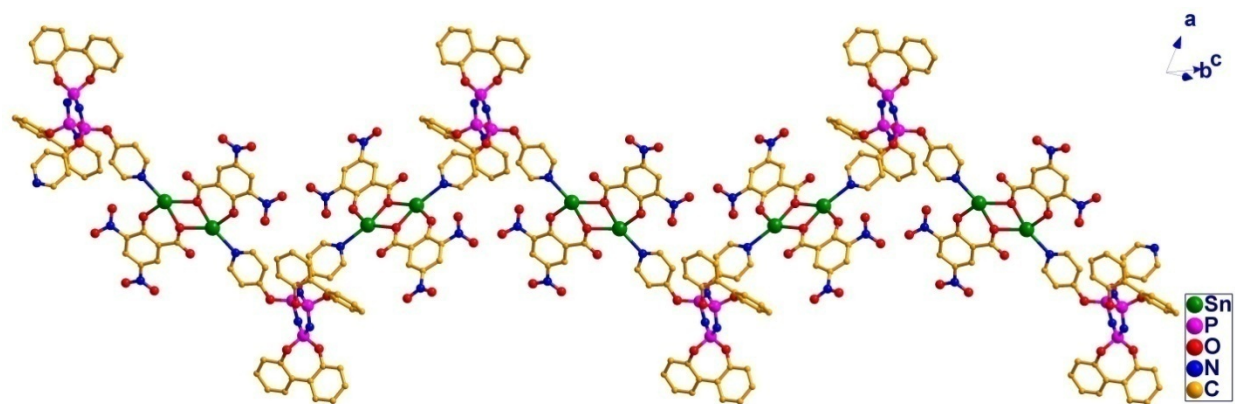

FigureS4: Zig-zag coordination polymer (2).

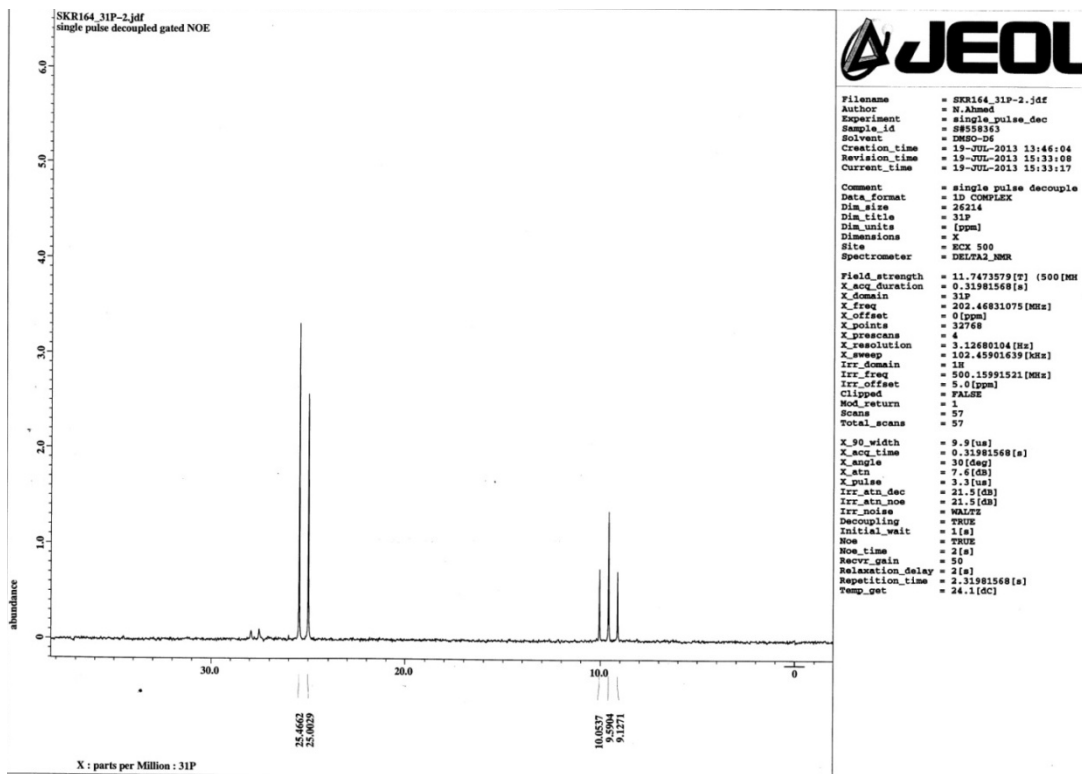

Figure S5:  $^{31}\text{P}$  NMR of 2.



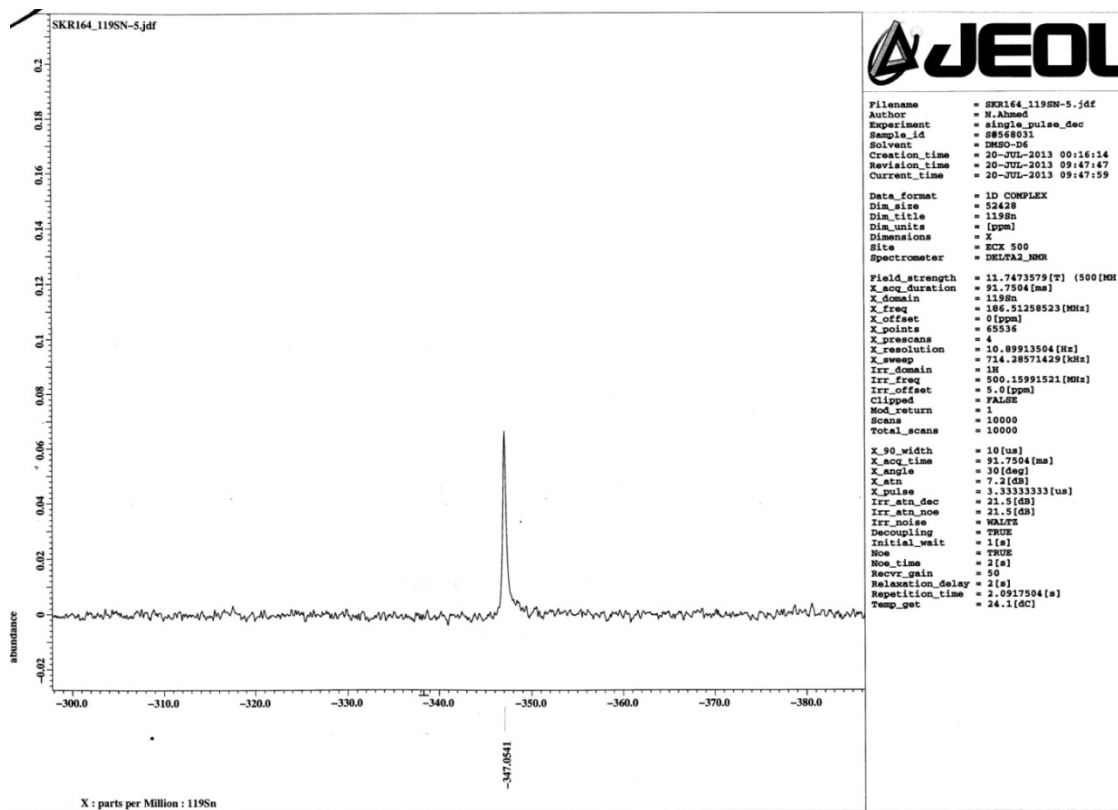

Figure S6:  $^{119}\text{Sn}$  NMR of 2.

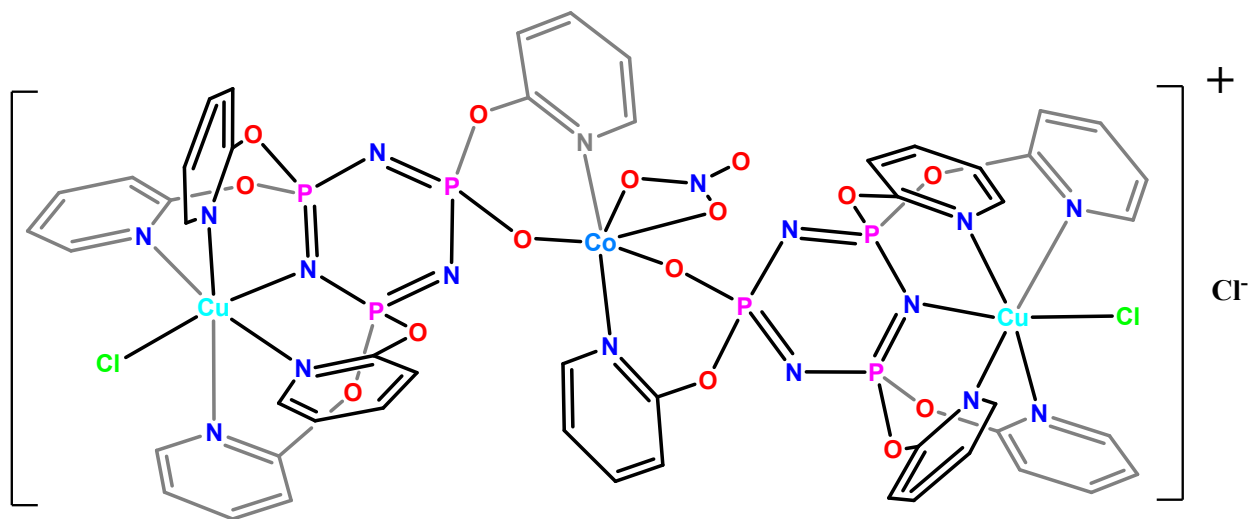

**Figure S7:** Co(II)-mediated hydrolysis product  $[\{(LCuCl)_2(Co(NO_3))\}Cl]$  where (L)=  $N_3P_3(OC_5H_4N)_5(O)$  (Reference: V. Chandrasekhar, B. M. Pandian and R. Azhakar, *Inorg. Chem.* 2006, **45**, 3510)

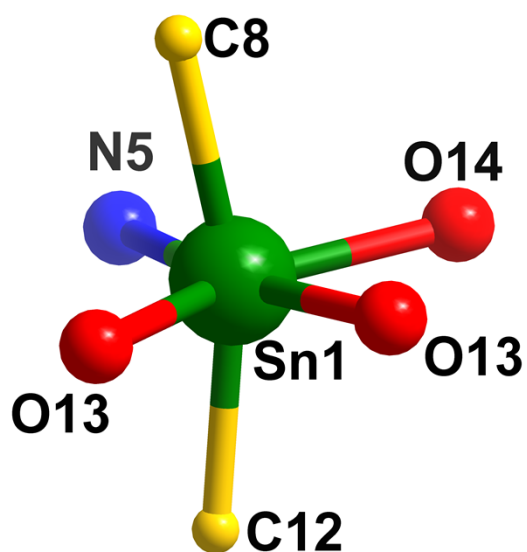

**Figure S8:**Coordination environment around the tin atoms of **2**(distorted octahedral geometry)

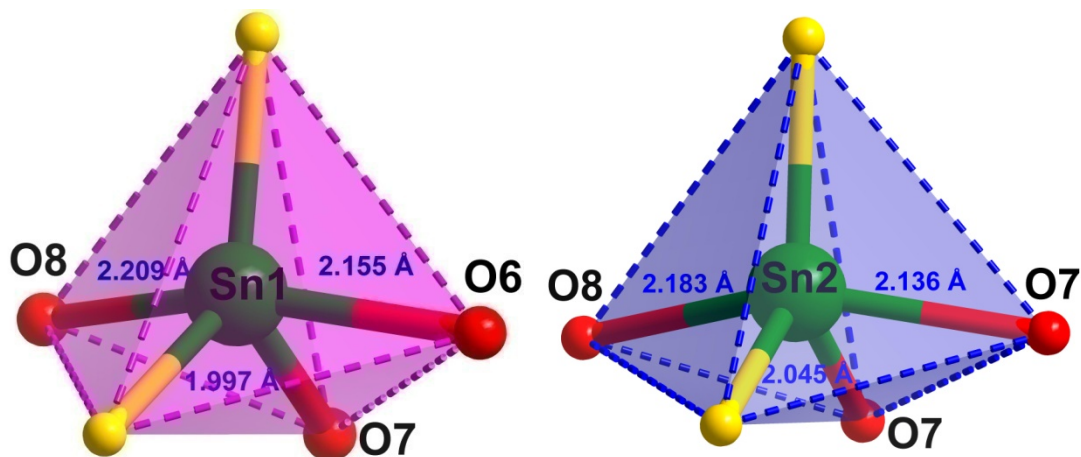

**Figure S9:**(a) Coordination environment around terminal tin(Sn1) atoms [distorted rectangular pyramidal geometry ( $\tau = 0.41$ , cf. the  $\tau$  values for the idealized geometries are  $\tau = 0$ , rectangular pyramidal;  $\tau = 1$ , trigonal bipyramidal)]<sup>3</sup> (b) around central tin atoms [distorted rectangular pyramidal geometry ( $\tau = 0.31$ )]

**Reference:**

3. A. W. Addison, T. N. Rao, J. Reedijk, J. van Rijn and G. C. Verschoor, *J. Chem. Soc., Dalton Trans.* **1984**, 1349.

**X-ray Crystallographic Study:** The crystal data for compounds **2** and **3** were collected on a Bruker D8 QUEST Diffractometer. SMART software package (version 5.628) was used for collecting data frames, SAINT software package (version 6.45) for integration of the intensity and scaling and SADABS was used for absorption correction. The structures were solved and refined by full-matrix least squares on  $F^2$  using SHELXTL software package.<sup>1</sup> Non-hydrogen atoms were refined with anisotropic displacement parameters. Figures and their bonding parameters were obtained from DIAMOND 3.1f software package.<sup>2</sup>

**Reference:**

(1) G. M. Sheldrick, SHELXTL version 6.14; Bruker AXS Inc.: Madison, WI, **2003**.

(2) (a) K.Brandenburg, Diamond, Ver. 3.1eM; Crystal Impact GbR: Bonn, Germany, **2005**.(b)

DIAMOND version 3.1f; Crystal Impact GbR: Bonn, Germany, **2004**.

**Table S1.** Crystal data and structure refinement parameters of compound **2** (ccdc 971483) and **3** (ccdc971484).

| Parameters                        | <b>2</b>                                                                                                       | <b>3</b>                                                                                       |
|-----------------------------------|----------------------------------------------------------------------------------------------------------------|------------------------------------------------------------------------------------------------|
| Empirical formula                 | C <sub>64</sub> H <sub>64</sub> N <sub>9</sub> O <sub>20</sub> P <sub>3</sub> Sn <sub>2</sub>                  | C <sub>86</sub> H <sub>124</sub> N <sub>6</sub> O <sub>18</sub> P <sub>6</sub> Sn <sub>4</sub> |
| Formula weight                    | 1609.58                                                                                                        | 2190.58                                                                                        |
| Temperature                       | 100(2) K                                                                                                       | 100(2) K                                                                                       |
| Wavelength                        | 0.71069 Å                                                                                                      | 0.71069 Å                                                                                      |
| Crystal system, space group       | Triclinic                                                                                                      | Monoclinic                                                                                     |
| Unit cell dimensions              | a = 11.378(5) Å<br>b = 14.319(5) Å<br>c = 23.323(5) Å<br>α = 82.037(5)°.<br>β = 79.189(5)°.<br>γ = 68.015(5)°. | a = 18.805(5) Å<br>b = 12.506(5) Å<br>c = 21.511(5) Å<br>α = 90<br>β = 110.835(5)°.<br>γ = 90  |
| Volume                            | 3451(2) Å <sup>3</sup>                                                                                         | 4728(3) Å <sup>3</sup>                                                                         |
| Z, Calculated density             | 2, 1.549 Mg/m <sup>3</sup>                                                                                     | 2, 1.539 Mg/m <sup>3</sup>                                                                     |
| Absorption coefficient            | 0.872 mm <sup>-1</sup>                                                                                         | 1.213 mm <sup>-1</sup>                                                                         |
| F(000)                            | 2264                                                                                                           | 2640                                                                                           |
| Crystal size                      | 0.20 x 0.18 x 0.15 mm <sup>3</sup>                                                                             | 0.14 x 0.13 x 0.10 mm <sup>3</sup>                                                             |
| θ range for data collection       | 1.83 to 25.50°                                                                                                 | 2.00 to 25.00°                                                                                 |
| Limiting indices                  | -13 ≤ h ≤ 13, -17 ≤ k ≤ 15,<br>-28 ≤ l ≤ 28                                                                    | -22 ≤ h ≤ 20, -13 ≤ k ≤ 14, -<br>24 ≤ l ≤ 25                                                   |
| Reflections collected / unique    | 18859/12631 [R(int) = 0.0290]                                                                                  | 31227/8327 [R(int) = 0.0684]                                                                   |
| Completeness to theta             | 98.2 %                                                                                                         | 99.8 %                                                                                         |
| Data / restraints / parameters    | 12631 / 0 / 887                                                                                                | 8327 / 24 / 549                                                                                |
| Goodness-of-fit on F <sup>2</sup> | 1.043                                                                                                          | 1.080                                                                                          |
| Final R indices [I > 2σ(I)]       | R1 = 0.0483, wR2 = 0.1294                                                                                      | R1 = 0.0702, wR2 = 0.1586                                                                      |
| R indices (all data)              | R1 = 0.0590, wR2 = 0.1544                                                                                      | R1 = 0.1185, wR2 = 0.1789                                                                      |
| Largest diff. peak and hole       | 2.206 and -0.963 e.Å <sup>-3</sup>                                                                             | 1.840 and -1.059 e.Å <sup>-3</sup>                                                             |

**Table S2:** Bond parameters of polymer 2:

| Bond lengths (Å) |          | Bond angles (°)     |            |
|------------------|----------|---------------------|------------|
| Sn(1)-C(8)       | 2.128(4) | C(8)-Sn(1)-C(12)    | 163.61(18) |
| Sn(1)-C(12)      | 2.128(4) | C(8)-Sn(1)-O(14)    | 95.63(14)  |
| Sn(1)-O(14)      | 2.132(3) | C(12)-Sn(1)-O(14)   | 99.63(15)  |
| Sn(1)-O(13)      | 2.195(3) | C(8)-Sn(1)-O(13)    | 92.87(15)  |
| Sn(1)-O(13)#1    | 2.426(3) | C(12)-Sn(1)-O(13)   | 95.58(16)  |
| Sn(1)-N(5)       | 2.429(4) | O(14)-Sn(1)-O(13)   | 80.14(11)  |
| Sn(2)-O(7)       | 2.105(3) | C(8)-Sn(1)-O(13)#1  | 83.16(14)  |
| Sn(2)-C(30)      | 2.128(5) | C(12)-Sn(1)-O(13)#1 | 87.67(14)  |
| Sn(2)-C(26)      | 2.131(5) | O(14)-Sn(1)-O(13)#1 | 145.16(11) |
| Sn(2)-O(6)       | 2.173(3) | O(13)-Sn(1)-O(13)#1 | 65.20(12)  |
| Sn(2)-O(6)#2     | 2.440(3) | C(8)-Sn(1)-N(5)     | 89.48(15)  |
| Sn(2)-N(4)       | 2.486(4) | C(12)-Sn(1)-N(5)    | 85.73(16)  |
| P(2)-N(1)        | 1.574(4) | O(14)-Sn(1)-N(5)    | 85.86(13)  |
| P(2)-N(3)        | 1.579(4) | O(13)-Sn(1)-N(5)    | 165.96(12) |
| P(2)-O(8)        | 1.593(3) | O(13)#1-Sn(1)-N(5)  | 128.84(12) |
| P(2)-O(9)        | 1.606(3) | O(7)-Sn(2)-C(30)    | 100.18(16) |
| P(3)-N(2)        | 1.568(4) | O(7)-Sn(2)-C(26)    | 98.75(16)  |
| P(3)-N(3)        | 1.586(4) | C(30)-Sn(2)-C(26)   | 157.99(19) |
| P(3)-O(17)       | 1.588(3) | O(7)-Sn(2)-O(6)     | 80.95(12)  |
| P(3)-O(18)       | 1.591(3) | C(30)-Sn(2)-O(6)    | 99.70(16)  |
| P(1)-N(2)        | 1.577(4) | C(26)-Sn(2)-O(6)    | 94.26(16)  |
| P(1)-O(19)       | 1.581(3) | O(7)-Sn(2)-O(6)#2   | 146.44(11) |
| P(1)-O(20)       | 1.591(3) | C(30)-Sn(2)-O(6)#2  | 85.65(15)  |
| P(1)-N(1)        | 1.596(4) | C(26)-Sn(2)-O(6)#2  | 84.76(15)  |
| O(18)-C(53)      | 1.406(5) | O(6)-Sn(2)-O(6)#2   | 65.49(13)  |
| O(9)-C(18)       | 1.375(5) | O(7)-Sn(2)-N(4)     | 84.22(13)  |
| O(20)-C(52)      | 1.402(5) | C(30)-Sn(2)-N(4)    | 84.58(16)  |
| O(8)-C(21)       | 1.396(5) | C(26)-Sn(2)-N(4)    | 86.26(16)  |
| O(19)-C(41)      | 1.414(5) | O(6)-Sn(2)-N(4)     | 165.07(12) |
| O(6)-C(34)       | 1.313(6) | O(6)#2-Sn(2)-N(4)   | 129.33(12) |

|               |          |                     |            |
|---------------|----------|---------------------|------------|
| O(6)-Sn(2)#2  | 2.440(3) | N(1)-P(2)-N(3)      | 118.8(2)   |
| O(13)-C(65)   | 1.298(5) | N(1)-P(2)-O(8)      | 111.10(18) |
| O(13)-Sn(1)#1 | 2.426(3) | N(3)-P(2)-O(8)      | 109.38(18) |
| O(17)-C(60)   | 1.405(5) | N(1)-P(2)-O(9)      | 105.69(18) |
| O(10)-N(7)    | 1.229(5) | N(3)-P(2)-O(9)      | 111.82(18) |
| O(7)-C(36)    | 1.298(5) | O(8)-P(2)-O(9)      | 97.99(16)  |
| O(3)-N(8)     | 1.208(6) | N(2)-P(3)-N(3)      | 117.71(19) |
| N(4)-C(24)    | 1.332(6) | N(2)-P(3)-O(17)     | 107.23(19) |
| N(4)-C(23)    | 1.332(6) | N(3)-P(3)-O(17)     | 110.19(19) |
| O(1)-N(9)     | 1.224(6) | N(2)-P(3)-O(18)     | 112.52(19) |
| O(11)-N(7)    | 1.235(5) | N(3)-P(3)-O(18)     | 104.59(18) |
| N(5)-C(16)    | 1.336(6) | O(17)-P(3)-O(18)    | 103.76(16) |
| N(5)-C(20)    | 1.349(6) | N(2)-P(1)-O(19)     | 112.63(19) |
| O(12)-C(65)   | 1.225(5) | N(2)-P(1)-O(20)     | 106.03(19) |
| O(5)-C(34)    | 1.220(6) | O(19)-P(1)-O(20)    | 103.39(17) |
| O(14)-C(1)    | 1.296(5) | N(2)-P(1)-N(1)      | 117.5(2)   |
| N(10)-O(15)   | 1.234(5) | O(19)-P(1)-N(1)     | 104.19(18) |
| N(10)-O(16)   | 1.237(5) | O(20)-P(1)-N(1)     | 112.32(18) |
| N(10)-C(6)    | 1.465(6) | C(53)-O(18)-P(3)    | 121.3(3)   |
| C(58)-C(57)   | 1.398(6) | C(18)-O(9)-P(2)     | 125.0(3)   |
| C(58)-C(53)   | 1.405(6) | C(52)-O(20)-P(1)    | 119.8(3)   |
| C(58)-C(59)   | 1.480(7) | C(21)-O(8)-P(2)     | 125.5(3)   |
| N(8)-O(4)     | 1.243(6) | C(41)-O(19)-P(1)    | 119.9(3)   |
| N(8)-C(37)    | 1.475(6) | C(34)-O(6)-Sn(2)    | 137.0(3)   |
| C(6)-C(5)     | 1.370(6) | C(34)-O(6)-Sn(2)#2  | 108.5(3)   |
| C(6)-C(1)     | 1.423(6) | Sn(2)-O(6)-Sn(2)#2  | 114.50(13) |
| N(9)-O(2)     | 1.226(6) | C(65)-O(13)-Sn(1)   | 136.8(3)   |
| N(9)-C(39)    | 1.456(6) | C(65)-O(13)-Sn(1)#1 | 106.9(3)   |
| C(3)-C(4)     | 1.387(6) | Sn(1)-O(13)-Sn(1)#1 | 114.80(12) |
| C(3)-C(2)     | 1.387(6) | C(60)-O(17)-P(3)    | 118.1(3)   |
| C(2)-C(1)     | 1.429(6) | C(36)-O(7)-Sn(2)    | 133.1(3)   |
| C(2)-C(65)    | 1.497(6) | C(24)-N(4)-C(23)    | 117.0(4)   |
| N(7)-C(4)     | 1.456(6) | C(24)-N(4)-Sn(2)    | 114.4(3)   |
| C(41)-C(46)   | 1.387(6) | C(23)-N(4)-Sn(2)    | 128.6(3)   |
| C(41)-C(42)   | 1.391(6) | P(2)-N(3)-P(3)      | 120.9(2)   |

|             |          |                   |          |
|-------------|----------|-------------------|----------|
| C(53)-C(54) | 1.372(6) | C(16)-N(5)-C(20)  | 117.4(4) |
| C(4)-C(5)   | 1.375(6) | C(16)-N(5)-Sn(1)  | 118.3(3) |
| C(40)-C(39) | 1.366(7) | C(20)-N(5)-Sn(1)  | 124.0(3) |
| C(40)-C(35) | 1.403(6) | P(2)-N(1)-P(1)    | 119.0(2) |
| C(36)-C(35) | 1.415(6) | C(1)-O(14)-Sn(1)  | 132.6(3) |
| C(36)-C(37) | 1.435(6) | P(3)-N(2)-P(1)    | 122.5(2) |
| C(64)-C(63) | 1.389(7) | O(15)-N(10)-O(16) | 122.9(4) |
| C(64)-C(59) | 1.395(7) | O(15)-N(10)-C(6)  | 118.1(4) |
| C(17)-C(16) | 1.376(6) | O(16)-N(10)-C(6)  | 119.0(4) |
| C(17)-C(18) | 1.392(6) | C(57)-C(58)-C(53) | 116.7(4) |
| C(23)-C(22) | 1.367(7) | C(57)-C(58)-C(59) | 121.5(4) |
| C(18)-C(19) | 1.361(7) | C(53)-C(58)-C(59) | 121.8(4) |
| C(38)-C(37) | 1.363(7) | O(3)-N(8)-O(4)    | 125.4(5) |
| C(38)-C(39) | 1.402(7) | O(3)-N(8)-C(37)   | 119.4(5) |
| C(59)-C(60) | 1.404(6) | O(4)-N(8)-C(37)   | 115.2(5) |
| C(46)-C(45) | 1.417(6) | C(5)-C(6)-C(1)    | 125.0(4) |
| C(46)-C(47) | 1.480(6) | C(5)-C(6)-N(10)   | 114.8(4) |
| C(52)-C(51) | 1.371(6) | C(1)-C(6)-N(10)   | 120.1(4) |
| C(52)-C(47) | 1.400(6) | O(1)-N(9)-O(2)    | 123.3(4) |
| C(35)-C(34) | 1.494(6) | O(1)-N(9)-C(39)   | 118.4(4) |
| C(10)-C(11) | 1.520(7) | O(2)-N(9)-C(39)   | 118.3(4) |
| C(10)-C(9)  | 1.521(6) | C(4)-C(3)-C(2)    | 121.1(4) |
| C(42)-C(43) | 1.392(7) | C(3)-C(2)-C(1)    | 121.1(4) |
| C(21)-C(22) | 1.376(7) | C(3)-C(2)-C(65)   | 115.2(4) |
| C(21)-C(25) | 1.382(6) | C(1)-C(2)-C(65)   | 123.6(4) |
| C(20)-C(19) | 1.396(7) | O(10)-N(7)-O(11)  | 124.1(4) |
| C(61)-C(62) | 1.364(7) | O(10)-N(7)-C(4)   | 118.7(4) |
| C(61)-C(60) | 1.385(7) | O(11)-N(7)-C(4)   | 117.2(4) |
| C(56)-C(55) | 1.368(7) | C(46)-C(41)-C(42) | 123.1(4) |
| C(56)-C(57) | 1.396(7) | C(46)-C(41)-O(19) | 119.1(4) |
| C(24)-C(25) | 1.386(6) | C(42)-C(41)-O(19) | 117.7(4) |
| C(48)-C(49) | 1.379(6) | C(54)-C(53)-C(58) | 122.4(4) |
| C(48)-C(47) | 1.395(6) | C(54)-C(53)-O(18) | 118.3(4) |
| C(50)-C(49) | 1.398(7) | C(58)-C(53)-O(18) | 119.0(4) |
| C(50)-C(51) | 1.404(6) | C(5)-C(4)-C(3)    | 120.2(4) |

|             |           |                   |          |
|-------------|-----------|-------------------|----------|
| C(30)-C(31) | 1.519(7)  | C(5)-C(4)-N(7)    | 119.7(4) |
| C(43)-C(44) | 1.365(7)  | C(3)-C(4)-N(7)    | 119.9(4) |
| C(54)-C(55) | 1.382(7)  | O(14)-C(1)-C(6)   | 119.1(4) |
| C(62)-C(63) | 1.403(8)  | O(14)-C(1)-C(2)   | 126.9(4) |
| C(44)-C(45) | 1.400(7)  | C(6)-C(1)-C(2)    | 113.9(4) |
| C(27)-C(28) | 1.494(7)  | C(39)-C(40)-C(35) | 120.9(4) |
| C(27)-C(26) | 1.531(7)  | O(7)-C(36)-C(35)  | 126.6(4) |
| C(9)-C(8)   | 1.531(6)  | O(7)-C(36)-C(37)  | 118.6(4) |
| C(32)-C(33) | 1.507(8)  | C(35)-C(36)-C(37) | 114.8(4) |
| C(32)-C(31) | 1.530(7)  | C(63)-C(64)-C(59) | 120.9(5) |
| C(12)-C(13) | 1.509(7)  | C(16)-C(17)-C(18) | 117.9(4) |
| C(28)-C(29) | 1.543(7)  | N(4)-C(23)-C(22)  | 124.7(5) |
| C(13)-C(66) | 1.413(11) | C(19)-C(18)-O(9)  | 124.9(4) |
| C(66)-C(67) | 1.677(13) | C(19)-C(18)-C(17) | 119.8(4) |
|             |           | O(9)-C(18)-C(17)  | 115.3(4) |
|             |           | C(37)-C(38)-C(39) | 117.6(4) |
|             |           | C(64)-C(59)-C(60) | 117.8(4) |
|             |           | C(64)-C(59)-C(58) | 122.0(4) |
|             |           | C(60)-C(59)-C(58) | 120.2(4) |
|             |           | C(41)-C(46)-C(45) | 117.4(4) |
|             |           | C(41)-C(46)-C(47) | 122.1(4) |
|             |           | C(45)-C(46)-C(47) | 120.5(4) |
|             |           | C(51)-C(52)-O(20) | 117.8(4) |
|             |           | C(51)-C(52)-C(47) | 123.6(4) |
|             |           | O(20)-C(52)-C(47) | 118.5(4) |
|             |           | C(40)-C(35)-C(36) | 120.8(4) |
|             |           | C(40)-C(35)-C(34) | 114.6(4) |
|             |           | C(36)-C(35)-C(34) | 124.6(4) |
|             |           | C(11)-C(10)-C(9)  | 112.7(4) |
|             |           | C(43)-C(42)-C(41) | 118.4(4) |
|             |           | O(12)-C(65)-O(13) | 120.3(4) |
|             |           | O(12)-C(65)-C(2)  | 121.1(4) |
|             |           | O(13)-C(65)-C(2)  | 118.6(4) |
|             |           | C(22)-C(21)-C(25) | 120.6(4) |
|             |           | C(22)-C(21)-O(8)  | 117.3(4) |



|                   |          |
|-------------------|----------|
| C(25)-C(21)-O(8)  | 122.1(4) |
| N(5)-C(20)-C(19)  | 122.4(4) |
| C(23)-C(22)-C(21) | 117.0(4) |
| C(38)-C(37)-C(36) | 124.7(4) |
| C(38)-C(37)-N(8)  | 117.0(4) |
| C(36)-C(37)-N(8)  | 118.3(4) |
| C(6)-C(5)-C(4)    | 118.5(4) |
| C(62)-C(61)-C(60) | 119.9(5) |
| C(55)-C(56)-C(57) | 120.3(5) |
| N(4)-C(24)-C(25)  | 123.4(4) |
| N(5)-C(16)-C(17)  | 123.8(4) |
| C(18)-C(19)-C(20) | 118.7(4) |
| C(61)-C(60)-C(59) | 121.5(4) |
| C(61)-C(60)-O(17) | 119.0(4) |
| C(59)-C(60)-O(17) | 119.5(4) |
| C(49)-C(48)-C(47) | 121.8(4) |
| C(49)-C(50)-C(51) | 119.6(4) |
| C(31)-C(30)-Sn(2) | 115.0(3) |
| C(52)-C(51)-C(50) | 118.5(4) |
| C(44)-C(43)-C(42) | 120.3(4) |
| C(53)-C(54)-C(55) | 119.4(4) |
| C(48)-C(49)-C(50) | 120.1(4) |
| C(40)-C(39)-C(38) | 121.1(4) |
| C(40)-C(39)-N(9)  | 120.1(4) |
| C(38)-C(39)-N(9)  | 118.7(4) |
| C(48)-C(47)-C(52) | 116.5(4) |
| C(48)-C(47)-C(46) | 122.3(4) |
| C(52)-C(47)-C(46) | 121.2(4) |
| C(56)-C(57)-C(58) | 120.9(5) |
| C(61)-C(62)-C(63) | 120.3(5) |
| C(43)-C(44)-C(45) | 121.4(5) |
| C(28)-C(27)-C(26) | 116.0(4) |
| O(5)-C(34)-O(6)   | 120.2(4) |
| O(5)-C(34)-C(35)  | 122.0(4) |
| O(6)-C(34)-C(35)  | 117.8(4) |

|                                                                                                    |          |
|----------------------------------------------------------------------------------------------------|----------|
| C(27)-C(26)-Sn(2)                                                                                  | 117.5(3) |
| C(10)-C(9)-C(8)                                                                                    | 111.0(4) |
| C(44)-C(45)-C(46)                                                                                  | 119.4(4) |
| C(21)-C(25)-C(24)                                                                                  | 117.2(4) |
| C(64)-C(63)-C(62)                                                                                  | 119.6(5) |
| C(33)-C(32)-C(31)                                                                                  | 112.7(5) |
| C(9)-C(8)-Sn(1)                                                                                    | 118.6(3) |
| C(13)-C(12)-Sn(1)                                                                                  | 114.8(3) |
| C(27)-C(28)-C(29)                                                                                  | 112.7(5) |
| C(30)-C(31)-C(32)                                                                                  | 114.6(4) |
| C(56)-C(55)-C(54)                                                                                  | 120.3(5) |
| C(66)-C(13)-C(12)                                                                                  | 114.9(7) |
| C(13)-C(66)-C(67)                                                                                  | 105.0(8) |
| Symmetry transformations used to generate equivalent atoms:<br>#1 -x+1,-y+2,-z+2 #2 -x+1,-y+1,-z+1 |          |

**Table S3:** Bond parameters of complex **3**.

| Bond lengths (Å) |           | Bond angles (°)   |           |
|------------------|-----------|-------------------|-----------|
| Sn(1)-O(7)       | 1.996(11) | O(7)-Sn(1)-C(27)  | 116.1(7)  |
| Sn(1)-C(27)      | 2.09(2)   | O(7)-Sn(1)-C(31)  | 113.6(7)  |
| Sn(1)-C(31)      | 2.14(2)   | C(27)-Sn(1)-C(31) | 129.9(7)  |
| Sn(1)-O(6)       | 2.157(10) | O(7)-Sn(1)-O(6)   | 82.7(4)   |
| Sn(1)-O(8)       | 2.211(11) | C(27)-Sn(1)-O(6)  | 96.6(6)   |
| Sn(2)-O(7)       | 2.044(10) | C(31)-Sn(1)-O(6)  | 95.4(6)   |
| Sn(2)-C(35)      | 2.08(3)   | O(7)-Sn(1)-O(8)   | 71.8(4)   |
| Sn(2)-C(39)      | 2.12(2)   | C(27)-Sn(1)-O(8)  | 93.8(7)   |
| Sn(2)-O(7)#1     | 2.138(11) | C(31)-Sn(1)-O(8)  | 95.7(7)   |
| Sn(2)-O(8)       | 2.183(12) | O(6)-Sn(1)-O(8)   | 154.4(4)  |
| P(1)-N(1)        | 1.556(13) | O(7)-Sn(2)-C(35)  | 116.3(8)  |
| P(1)-O(2)        | 1.582(11) | O(7)-Sn(2)-C(39)  | 117.1(8)  |
| P(1)-N(2)        | 1.589(12) | C(35)-Sn(2)-C(39) | 126.5(10) |

|              |           |                    |           |
|--------------|-----------|--------------------|-----------|
| P(1)-O(1)    | 1.590(10) | O(7)-Sn(2)-O(7)#1  | 73.8(5)   |
| P(2)-N(3)    | 1.566(13) | C(35)-Sn(2)-O(7)#1 | 98.3(8)   |
| P(2)-N(2)    | 1.584(13) | C(39)-Sn(2)-O(7)#1 | 97.8(8)   |
| P(2)-O(5)    | 1.590(11) | O(7)-Sn(2)-O(8)    | 71.5(4)   |
| P(2)-O(4)    | 1.603(10) | C(35)-Sn(2)-O(8)   | 95.5(8)   |
| P(3)-O(6)    | 1.515(10) | C(39)-Sn(2)-O(8)   | 99.2(8)   |
| P(3)-O(3)    | 1.573(13) | O(7)#1-Sn(2)-O(8)  | 145.3(4)  |
| P(3)-N(1)    | 1.599(13) | N(1)-P(1)-O(2)     | 105.9(6)  |
| P(3)-N(3)    | 1.605(12) | N(1)-P(1)-N(2)     | 119.5(7)  |
| O(1)-C(12)   | 1.397(16) | O(2)-P(1)-N(2)     | 111.5(7)  |
| O(2)-C(1)    | 1.396(19) | N(1)-P(1)-O(1)     | 113.3(7)  |
| O(3)-C(25)   | 1.44(2)   | O(2)-P(1)-O(1)     | 102.1(6)  |
| O(4)-C(13)   | 1.403(18) | N(2)-P(1)-O(1)     | 103.5(6)  |
| O(5)-C(24)   | 1.408(19) | N(3)-P(2)-N(2)     | 119.2(6)  |
| O(7)-Sn(2)#1 | 2.138(11) | N(3)-P(2)-O(5)     | 107.0(6)  |
| O(8)-C(26)   | 1.39(2)   | N(2)-P(2)-O(5)     | 110.7(7)  |
| C(1)-C(6)    | 1.38(2)   | N(3)-P(2)-O(4)     | 112.1(7)  |
| C(1)-C(5)    | 1.40(2)   | N(2)-P(2)-O(4)     | 105.2(6)  |
| C(2)-C(6)    | 1.36(3)   | O(5)-P(2)-O(4)     | 101.2(5)  |
| C(2)-C(3)    | 1.38(3)   | O(6)-P(3)-O(3)     | 102.4(7)  |
| C(3)-C(4)    | 1.37(3)   | O(6)-P(3)-N(1)     | 113.0(6)  |
| C(4)-C(5)    | 1.40(2)   | O(3)-P(3)-N(1)     | 107.7(7)  |
| C(5)-C(7)    | 1.48(2)   | O(6)-P(3)-N(3)     | 110.1(6)  |
| C(7)-C(12)   | 1.38(2)   | O(3)-P(3)-N(3)     | 109.4(7)  |
| C(7)-C(8)    | 1.39(2)   | N(1)-P(3)-N(3)     | 113.5(7)  |
| C(8)-C(9)    | 1.38(2)   | C(12)-O(1)-P(1)    | 119.5(8)  |
| C(9)-C(10)   | 1.38(2)   | C(1)-O(2)-P(1)     | 124.7(9)  |
| C(10)-C(11)  | 1.39(2)   | C(25)-O(3)-P(3)    | 118.5(11) |
| C(11)-C(12)  | 1.38(2)   | C(13)-O(4)-P(2)    | 117.3(8)  |
| C(13)-C(14)  | 1.35(2)   | C(24)-O(5)-P(2)    | 120.6(9)  |
| C(13)-C(18)  | 1.39(2)   | P(3)-O(6)-Sn(1)    | 123.2(6)  |
| C(14)-C(15)  | 1.40(2)   | Sn(1)-O(7)-Sn(2)   | 115.0(5)  |
| C(15)-C(16)  | 1.38(3)   | Sn(1)-O(7)-Sn(2)#1 | 138.7(5)  |
| C(16)-C(17)  | 1.37(3)   | Sn(2)-O(7)-Sn(2)#1 | 106.2(5)  |
| C(17)-C(18)  | 1.41(2)   | C(26)-O(8)-Sn(2)   | 127.0(11) |

|             |         |                   |           |
|-------------|---------|-------------------|-----------|
| C(18)-C(19) | 1.46(3) | C(26)-O(8)-Sn(1)  | 130.0(11) |
| C(19)-C(24) | 1.39(2) | Sn(2)-O(8)-Sn(1)  | 101.7(5)  |
| C(19)-C(20) | 1.41(2) | P(1)-N(1)-P(3)    | 124.1(7)  |
| C(20)-C(21) | 1.36(3) | P(2)-N(2)-P(1)    | 119.0(8)  |
| C(21)-C(22) | 1.39(3) | P(2)-N(3)-P(3)    | 123.8(8)  |
| C(22)-C(23) | 1.39(3) | C(6)-C(1)-C(5)    | 121.9(16) |
| C(23)-C(24) | 1.35(3) | C(6)-C(1)-O(2)    | 118.9(14) |
| C(27)-C(28) | 1.47(3) | C(5)-C(1)-O(2)    | 118.8(15) |
| C(28)-C(29) | 1.59(4) | C(6)-C(2)-C(3)    | 120(2)    |
| C(29)-C(30) | 1.46(4) | C(4)-C(3)-C(2)    | 119.8(19) |
| C(31)-C(32) | 1.53(3) | C(3)-C(4)-C(5)    | 121.7(17) |
| C(32)-C(33) | 1.57(3) | C(1)-C(5)-C(4)    | 116.3(16) |
| C(33)-C(34) | 1.54(3) | C(1)-C(5)-C(7)    | 123.1(15) |
| C(35)-C(36) | 1.36(4) | C(4)-C(5)-C(7)    | 120.6(14) |
| C(36)-C(37) | 1.52(4) | C(2)-C(6)-C(1)    | 120.0(17) |
| C(37)-C(38) | 1.46(3) | C(12)-C(7)-C(8)   | 117.4(16) |
| C(39)-C(40) | 1.51(4) | C(12)-C(7)-C(5)   | 121.3(13) |
| C(40)-C(41) | 1.40(5) | C(8)-C(7)-C(5)    | 121.2(15) |
| C(41)-C(42) | 1.62(5) | C(9)-C(8)-C(7)    | 121.1(17) |
| O(9)-C(43)  | 1.38(2) | C(10)-C(9)-C(8)   | 120.1(16) |
|             |         | C(9)-C(10)-C(11)  | 120.3(17) |
|             |         | C(12)-C(11)-C(10) | 118.2(17) |
|             |         | C(7)-C(12)-C(11)  | 122.7(14) |
|             |         | C(7)-C(12)-O(1)   | 120.4(14) |
|             |         | C(11)-C(12)-O(1)  | 116.7(15) |
|             |         | C(14)-C(13)-C(18) | 123.7(16) |
|             |         | C(14)-C(13)-O(4)  | 118.0(15) |
|             |         | C(18)-C(13)-O(4)  | 118.2(17) |
|             |         | C(13)-C(14)-C(15) | 119.1(17) |
|             |         | C(16)-C(15)-C(14) | 119(2)    |
|             |         | C(17)-C(16)-C(15) | 120.6(17) |
|             |         | C(16)-C(17)-C(18) | 121.2(18) |
|             |         | C(13)-C(18)-C(17) | 116.1(19) |
|             |         | C(13)-C(18)-C(19) | 121.7(15) |
|             |         | C(17)-C(18)-C(19) | 122.3(17) |

|       |                                                                               |           |
|-------|-------------------------------------------------------------------------------|-----------|
|       | C(24)-C(19)-C(20)                                                             | 117.4(19) |
|       | C(24)-C(19)-C(18)                                                             | 121.1(15) |
|       | C(20)-C(19)-C(18)                                                             | 121.5(16) |
|       | C(21)-C(20)-C(19)                                                             | 120.7(18) |
|       | C(20)-C(21)-C(22)                                                             | 120.1(19) |
|       | C(23)-C(22)-C(21)                                                             | 120(2)    |
|       | C(24)-C(23)-C(22)                                                             | 119.9(18) |
|       | C(23)-C(24)-C(19)                                                             | 121.9(16) |
|       | C(23)-C(24)-O(5)                                                              | 119.2(15) |
|       | C(19)-C(24)-O(5)                                                              | 118.7(17) |
|       | C(28)-C(27)-Sn(1)                                                             | 115.6(15) |
|       | C(27)-C(28)-C(29)                                                             | 116(2)    |
|       | C(30)-C(29)-C(28)                                                             | 113(2)    |
|       | C(32)-C(31)-Sn(1)                                                             | 115.7(13) |
|       | C(31)-C(32)-C(33)                                                             | 114.4(18) |
|       | C(34)-C(33)-C(32)                                                             | 110(2)    |
|       | C(36)-C(35)-Sn(2)                                                             | 124(2)    |
|       | C(35)-C(36)-C(37)                                                             | 128(3)    |
|       | C(38)-C(37)-C(36)                                                             | 117(3)    |
|       | C(40)-C(39)-Sn(2)                                                             | 130(2)    |
|       | C(41)-C(40)-C(39)                                                             | 115(4)    |
|       | C(40)-C(41)-C(42)                                                             | 109(4)    |
| <hr/> |                                                                               |           |
|       | Symmetry transformations used to generate equivalent atoms: #1 -x+2,-y+1,-z+1 |           |
